# Supplementary material for: The comorbidities of dysmenorrhea: a clinical survey comparing symptom profile in women with and without endometriosis
Source: PubMed Central journal article supplement — J Pain Res. 2018 Dec 13;11:3181–94. doi: 10.2147/JPR.S179409 (PMC6300370; doi:10.2147/jpr.s179409), 2018-12-13
Supplement: JPR-11-3181-179409.pdf [file JPR-11-3181-179409.pdf]

# Pelvic Pain Questionnaire

©Copyright. Pelvic Pain Foundation of Australia.  
www.pelvicpain.org.au

Before your visit we ask that you answer the questions on this sheet. They help us understand your concerns better and allow us more time at your visit to discuss the issues most important to you.

For some of the questions we have asked you to tell us how bad your pain is on a scale from 0-10. A score of 0 would mean No pain at all, and 10 would be the worst pain you can imagine. Other questions ask you to circle the answer that describes your pain best. If your problems vary from month to month, think about how they might affect you on a typical month over the last 3 months.

## You and your pain

1. Your age \_\_\_\_\_
3. How many days over an average month would you have pelvic pain or discomfort of any kind, even mild pain? (number 1-30) \_\_\_\_\_
4. How many days over an average month would you be entirely well with no pelvic discomfort at all? (number 1-30) \_\_\_\_\_  
*(Please note that the answer to Q 3 and Q 4 should add up to 30)*
5. How much pain do you have today? Pain Score (0-10) \_\_\_\_\_

## Your Medications

7. Are you currently using any of these hormonal medications?

|                                           |          |                      |
|-------------------------------------------|----------|----------------------|
| Implanon                                  | Yes / No |                      |
| Mirena IUCD                               | Yes / No |                      |
| Oral contraceptive pill                   | Yes / No | (name of pill) _____ |
| Other                                     | Yes / No | (name) _____         |
| No, I don't use any hormonal preparations |          |                      |

## Your Periods

10. How old were you when your periods started? \_\_\_\_\_
11. Do you have period pain? Yes / No / Occasionally Pain Score (0-10) \_\_\_\_\_  
*If so,*  
How old were you when your periods became painful? \_\_\_\_\_  
For how many days each month do you have period pain? \_\_\_\_\_

Where do you feel your period pain? (circle as many as apply)

Low abdomen at the front / Lower back  
Left side lower abdomen / Right side lower abdomen  
Front of the legs / Back of the legs / Foot / Anal area  
Another place \_\_\_\_\_

Does the contraceptive pill help your period pain? (circle)

Yes, a lot / a little / not at all / I have never tried the pill /  
My period pain started when I stopped taking the pill

Do period pain medications (ibuprofen, Ponstan, Naprogesic etc) help your period pain?

Yes, a lot / a little / not at all / I have never tried these medications

12. When was the first day of your last period? \_\_\_\_\_

13. How long between the first day of one period and first day of the next period? \_\_\_\_\_

14. How heavy is the bleeding? Light / Medium / Heavy / Variable

### **Stabbing pains in your abdomen**

15. Do you have sudden or stabbing pains in the pelvis or abdomen?

Yes / No / Occasionally Pain Score (0-10) \_\_\_\_\_

*If so,*

How old were you when these pains started? \_\_\_\_\_

Where do you feel these pains? (circle as many as apply)

Low abdomen at the front / Lower back  
Left side lower abdomen / Right side lower abdomen  
Front of the legs / Back of the legs / Foot / Anal area  
Another place \_\_\_\_\_

Do any exercises or movements make these pains worse?

Yes / No \_\_\_\_\_

Do any exercises or movements make these pains better?

Yes / No \_\_\_\_\_

### Your Bowel

16. Do you have problems with your bowel? Yes / No / Occasionally

*If so,*

How old were you when your bowel problems started? \_\_\_\_\_

Do you have constipation? Yes / No / Sometimes / Only with periods

Do you have diarrhoea? Yes / No / Sometimes / Only with periods

Do you feel bloated? Yes / No / Sometimes / Only with periods

Do you have bowel pain? Yes / No / Sometimes / Only with periods

### Your Diet

17. Are there foods that don't suit you? Yes / No

*If so, which foods don't suit you?*

Wheat Yes / No

Dairy foods Yes / No

Fatty foods Yes / No

Other foods \_\_\_\_\_

Food Allergies \_\_\_\_\_

### Your Bladder

18. How many times do you pass urine each day?

While awake? \_\_\_\_\_

At night, after going to sleep? \_\_\_\_\_

19. Do you have problems with your bladder? Yes / No / Occasionally / only with periods

*If so, At what age did these bladder problems start? \_\_\_\_\_*

When you need to pass urine, can you wait until later, or do you need to go straight away?

I can wait until later / I need to pass urine straight away

Do you have bladder pain? Yes / No / Only when I try to 'hold on'

Pain Score (0-10) \_\_\_\_\_

Do you have pain passing urine? Yes / No / Occasionally / Only with periods

Are there times when you find it difficult to start passing urine? Yes / No / Occasionally

How much fluid do you drink each day? \_\_\_\_\_

### Headaches

20. Do you get headaches? Yes / No / Occasionally

*If so,*

At what age did your headaches start? \_\_\_\_\_

Do you get headaches at period time? Yes / No / Every period / Some periods

Pain Score (0-10) \_\_\_\_\_

Do you get bad headaches or migraines at other times? Yes / No / Occasionally

Pain Score (0-10) \_\_\_\_\_

Do you get milder background headaches at other times? Yes / No / Occasionally

Pain Score (0-10) \_\_\_\_\_

21. Have you ever been diagnosed with migraines? Yes / No

22. How many days a month do you have a headache, even a mild headache? \_\_\_\_\_

23. How many days a month are you completely free of headache (no headache at all)? \_\_\_\_\_  
(Please note that the answers to questions 22 and 23 should add up to 30)

### Your General Wellbeing

25. Do you have any of the following symptoms?

|                               |                              |
|-------------------------------|------------------------------|
| Unusual tiredness or fatigue? | Yes / No / only with periods |
| Poor sleep?                   | Yes / No / only with periods |
| Unusual sweating?             | Yes / No / only with periods |
| Dizziness or feeling faint?   | Yes / No / only with periods |
| Anxiety?                      | Yes / No / only with periods |
| Low mood?                     | Yes / No / only with periods |
| Nausea?                       | Yes / No / only with periods |

### Your Vulva (The Vulva is the skin between your legs near the opening of the vagina)

24. Do you have vulval pain? Yes / No Pain Score (0-10) \_\_\_\_\_

*If so,*

When would you get this pain? (circle as many as apply)

Anytime / with intercourse / using tampons / only with a vaginal infection or thrush

## Your Sexual Wellbeing

Please note that questions 26 to 31 are optional and may not apply to all girls or women.

26. Are you currently or have you ever been in a sexual relationship?

Yes / No / I prefer not to answer this question

*If so,*

Do you feel pain or discomfort during sexual activity? Yes / No / Occasionally

Pain Score (0-10) \_\_\_\_\_

When do you get this pain? (please circle as many as apply)

With arousal / during intercourse / after intercourse / the day after intercourse

At what age did intercourse become painful? \_\_\_\_\_

Have you experienced distressing sexual events during your life, including sexual assault?

Yes / No / I prefer not to answer this question / I would like to discuss this during my appointment / I prefer *not* to discuss this during my appointment

## Pregnancy and Contraception

27. Have you ever been pregnant? Yes / No

28. Do you have children? \_\_\_\_\_ How many? \_\_\_\_\_

29. Are you currently trying to become pregnant? \_\_\_\_\_

*If not,* what type of contraception are you using? \_\_\_\_\_

30. When was your last smear test? \_\_\_\_\_ Was it normal? \_\_\_\_\_

It is possible that we may wish to use this data anonymously in the future for research purposes. We will only do this with your consent. Please note that the sheet with your personal details would be removed from this record and you would not be identified in any way. (please tick a box)

**Yes, I agree to this information being used anonymously for research**   
**No, I do not agree to this information being used anonymously for research**

Thank you very much for taking the time to complete this questionnaire

©Copyright. Pelvic Pain Foundation of Australia. [www.pelvicpain.org.au](http://www.pelvicpain.org.au)
